# Supplementary material for: Calcite surface structure and reactivity: molecular dynamics simulations and macroscopic surface modelling of the calcite–water interface
Source: Royal Society of Chemistry journal article supplement (doi:10.1039/c2cp42290e), 2012-01-01
Supplement: c2cp42290e.pdf [file c2cp42290e.pdf]

**Electronic Supplementary Information** to the paper entitled: “Calcite surface structure and reactivity: molecular dynamics simulations and macroscopic surface modelling of the calcite-water interface” by M. Wolthers, D. Di Tommaso, Z. Du and N.H de Leeuw

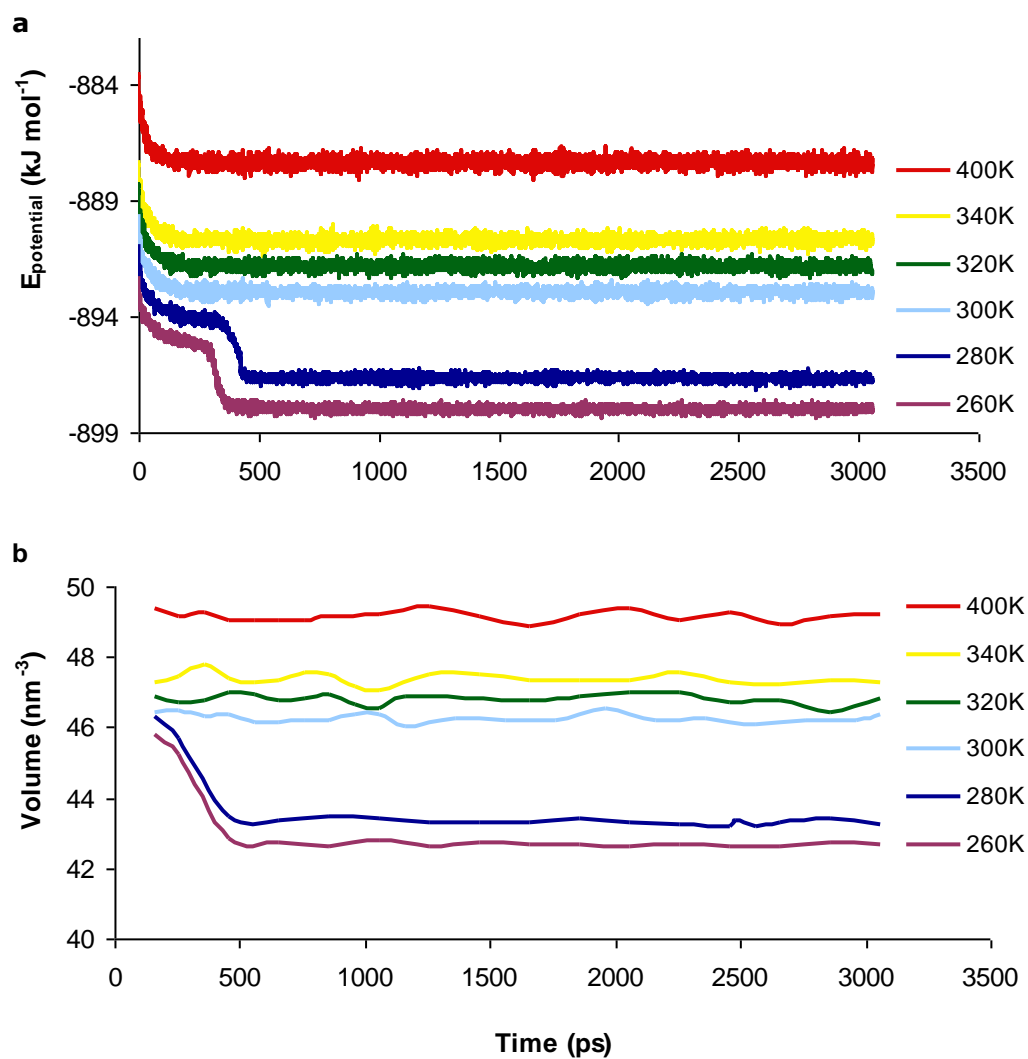

Figure S1. (A) Potential energy and (B) volume for 2028 water molecules at six different temperatures during NPT production. Within 500 ps of production, a phase change is observed for water at 260K and 280K.

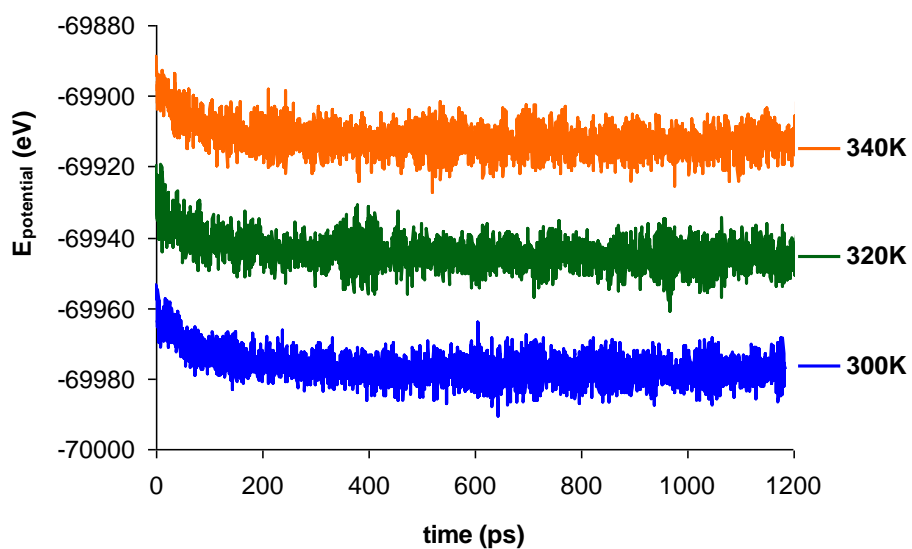

Figure S2. Potential energy for calcite slab (840 CaCO<sub>3</sub>) with water layer (2048 H<sub>2</sub>O; density  $\rho = 1.21 \text{ g/cm}^3$  at 300K<sup>Error! Reference source not found.</sup>) during production in NPT at different temperatures.

Table S1. Potential parameters used in this work (short-range cut-off 8.0 Å).

| Charges (e)                                               |                           | Core-shell interaction (eV Å <sup>-2</sup> ) |                        |
|-----------------------------------------------------------|---------------------------|----------------------------------------------|------------------------|
| Ion                                                       | Core                      | Shell                                        |                        |
| Ca                                                        | +2.000                    |                                              |                        |
| C                                                         | +1.135                    |                                              |                        |
| H                                                         | +0.400                    |                                              |                        |
| Carbonate oxygen (O)                                      | +0.587                    | -1.632                                       | 507.400000             |
| Water oxygen (O <sub>water</sub> )                        | +1.250                    | -2.050                                       | 209.449602             |
| <b>Buckingham potential</b>                               |                           |                                              |                        |
| Ion pair                                                  | A (eV)                    | ρ (Å)                                        | C (eV Å <sup>6</sup> ) |
| Ca-O                                                      | 1550.0                    | 0.29700                                      | 0.0                    |
| Ca-O <sub>water</sub>                                     | 1186.6                    | 0.29700                                      | 0.0                    |
| H-O                                                       | 396.3                     | 0.23000                                      | 0.0                    |
| H-O <sub>water</sub>                                      | 396.3                     | 0.23000                                      | 10.0                   |
| O-O                                                       | 16,372.0                  | 0.21300                                      | 3.47                   |
| O-O <sub>water</sub>                                      | 12,533.6                  | 0.21300                                      | 12.09                  |
| C-O <sub>water</sub>                                      | 435.0                     | 0.34370                                      | 0.0                    |
| <b>Lennard-Jones potential</b>                            |                           |                                              |                        |
|                                                           | A (eV Å <sup>12</sup> )   |                                              | B (eV Å <sup>6</sup> ) |
| O <sub>water</sub> -O <sub>water</sub>                    | 39344.98                  |                                              | 42.15                  |
| <b>Morse potential</b>                                    |                           |                                              |                        |
|                                                           | D (eV)                    | A (Å <sup>-1</sup> )                         | r <sub>0</sub> (Å)     |
| C-O                                                       | 4.710000                  | 3.80000                                      | 1.18000                |
| H-O <sub>water</sub>                                      | 6.203713                  | 2.22003                                      | 0.92376                |
| H-H                                                       | 0                         | 2.840499                                     | 1.5                    |
| <b>Three-body potential</b>                               |                           |                                              |                        |
|                                                           | k (eV rad <sup>-2</sup> ) |                                              | Θ <sub>0</sub>         |
| O <sub>core</sub> -C-O <sub>core</sub>                    | 1.69000                   |                                              | 120.000000             |
| H-O <sub>water, shell</sub> -H                            | 4.19978                   |                                              | 108.693195             |
| <b>Four-body potential</b>                                |                           |                                              |                        |
|                                                           | k (eV rad <sup>-2</sup> ) |                                              | Θ <sub>0</sub>         |
| C-O <sub>core</sub> -O <sub>core</sub> -O <sub>core</sub> | 0.11290                   |                                              | 180.0                  |
| <b>Coulombic subtraction (%)</b>                          |                           |                                              |                        |
| H <sup>0.4+</sup> -O <sup>0.8-</sup>                      |                           | 50                                           |                        |
| H <sup>0.4+</sup> -H <sup>0.4+</sup>                      |                           | 50                                           |                        |

Table S2. Distribution of the number of hydrogen-bonds for the water molecules coordinated to the different calcium surface sites. The values given are percentages of molecules with the given number of hydrogen-bonds <sup>Error! Reference source not found.</sup>

|             | Ca <sup>2+</sup> position | number of hydrogen-bonds |       |       |       |       |       |       | average |
|-------------|---------------------------|--------------------------|-------|-------|-------|-------|-------|-------|---------|
|             |                           | 0 (%)                    | 1 (%) | 2 (%) | 3 (%) | 4 (%) | 5 (%) | 6 (%) |         |
| <b>300K</b> | Face site                 | 2.2                      | 19.8  | 42.7  | 27.4  | 7.1   | 0.8   | 0.1   | 2.20    |
|             | Acute edge site           | 3.1                      | 23.6  | 39.2  | 24.6  | 7.9   | 1.5   | 0.2   | 2.16    |
|             | Obtuse edge site          | 2.1                      | 17.4  | 42.2  | 28.1  | 8.9   | 1.2   | 0.1   | 2.28    |
|             | Acute corner site         | 2.2                      | 19.8  | 42.7  | 27.4  | 7.1   | 0.8   | 0.1   | 2.20    |
|             | Obtuse corner site        | 3.9                      | 23.6  | 39.1  | 24.3  | 7.8   | 1.1   | 0.2   | 2.13    |
| <b>320K</b> | Face site                 | 2.6                      | 20.1  | 42.4  | 27.1  | 7.0   | 0.75  |       | 2.18    |
|             | Acute edge site           | 4.0                      | 23.3  | 38.0  | 24.1  | 8.5   | 1.5   |       | 2.16    |
|             | Obtuse edge site          | 2.6                      | 18.6  | 40.1  | 28.5  | 9.1   | 1.2   |       | 2.27    |
|             | Acute corner site         | 2.7                      | 19.4  | 41.1  | 27.1  | 8.3   | 1.3   |       | 2.24    |
|             | Obtuse corner site        | 3.2                      | 22.5  | 40.4  | 25.4  | 7.4   | 1.2   |       | 2.15    |
| <b>340K</b> | Face site                 | 2.9                      | 21.1  | 42.1  | 26.2  | 6.8   | 0.8   |       | 2.16    |
|             | Acute edge site           | 4.1                      | 24.2  | 30.5  | 24.7  | 8.1   | 1.3   |       | 2.13    |
|             | Obtuse edge site          | 2.9                      | 20.4  | 40.0  | 27.0  | 8.1   | 1.3   |       | 2.22    |
|             | Acute corner site         | 2.5                      | 22.1  | 40.3  | 26.0  | 8.0   | 1.1   |       | 2.19    |
|             | Obtuse corner site        | 3.5                      | 23.9  | 39.6  | 23.8  | 8.1   | 1.1   |       | 2.13    |

Table S3. Distribution of the number of hydrogen-bonds<sup>56</sup> for oxygen within surface carbonate groups at structurally different positions.

|             | CO <sub>3</sub> <sup>2-</sup> position | number of hydrogen-bonds |       |       |       |       |       |       | average |
|-------------|----------------------------------------|--------------------------|-------|-------|-------|-------|-------|-------|---------|
|             |                                        | 0 (%)                    | 1 (%) | 2 (%) | 3 (%) | 4 (%) | 5 (%) | 6 (%) |         |
| <b>300K</b> | Face (A)                               | 34.4                     | 55.6  | 9.8   | 0.2   | 0.0   | 0.0   | 0.0   | 0.73    |
|             | Face (X)                               | 60.9                     | 34.2  | 4.8   | 0.1   | 0.0   | 0.0   | 0.0   | 0.30    |
|             | Face (B)                               | 51.9                     | 42.1  | 5.9   | 0.1   | 0.0   | 0.0   | 0.0   | 0.20    |
|             | Acute edge (A)                         | 21.1                     | 44.9  | 24.9  | 7.5   | 1.5   | 0.1   | 0.0   | 1.29    |
|             | Acute edge (X)                         | 33.9                     | 40.1  | 20.1  | 5.5   | 0.4   | 0.0   | 0.0   | 0.95    |
|             | Acute edge (B)                         | 48.0                     | 46.8  | 4.9   | 0.2   | 0.0   | 0.0   | 0.0   | 0.42    |
|             | Obtuse edge (A)                        | 34.9                     | 39.2  | 15.6  | 7.7   | 2.6   | 0.2   | 0.0   | 1.02    |
|             | Obtuse edge (X)                        | 17.2                     | 52.9  | 22.3  | 6.6   | 0.9   | 0.0   | 0.0   | 1.34    |
|             | Obtuse edge (B)                        | 62.1                     | 32.9  | 4.8   | 0.2   | 0.0   | 0.0   | 0.0   | 0.30    |
|             | Acute corner (A)                       | 21.4                     | 50.4  | 23.2  | 4.7   | 0.4   | 0.0   | 0.0   | 1.53    |
|             | Acute corner (X)                       | 19.2                     | 42.0  | 31.6  | 6.7   | 0.6   | 0.0   | 0.0   | 1.79    |
|             | Acute corner (B)                       | 23.9                     | 43.8  | 25.6  | 6.0   | 0.6   | 0.1   | 0.0   | 0.75    |
| <b>320K</b> | Face (A)                               | 32.0                     | 57.9  | 9.9   | 0.2   | 0.0   | 0.0   | 0.0   | 0.82    |
|             | Face (X)                               | 65.9                     | 31.9  | 3.7   | 0.1   | 0.0   | 0.0   | 0.0   | 0.26    |
|             | Face (B)                               | 52.6                     | 41.0  | 6.3   | 0.2   | 0.0   | 0.0   | 0.0   | 0.16    |
|             | Acute edge (A)                         | 24.6                     | 49.1  | 19.8  | 5.5   | 1.0   | 0.8   | 0.0   | 1.43    |
|             | Acute edge (X)                         | 34.8                     | 36.5  | 22.5  | 5.9   | 0.5   | 0.0   | 0.0   | 0.82    |
|             | Acute edge (B)                         | 58.3                     | 39.8  | 1.9   | 0.0   | 0.0   | 0.0   | 0.0   | 0.33    |
|             | Obtuse edge (A)                        | 35.7                     | 40.2  | 15.7  | 6.7   | 1.8   | 0.2   | 0.0   | 1.20    |
|             | Obtuse edge (X)                        | 27.7                     | 46.1  | 20.0  | 5.6   | 0.7   | 0.0   | 0.0   | 1.24    |
|             | Obtuse edge (B)                        | 70.2                     | 28.2  | 1.7   | 0.1   | 0.0   | 0.0   | 0.0   | 0.24    |
|             | Acute corner (A)                       | 26.2                     | 46.5  | 22.0  | 4.9   | 0.5   | 0.0   | 0.0   | 1.54    |
|             | Acute corner (X)                       | 18.9                     | 46.7  | 29.6  | 4.8   | 0.1   | 0.0   | 0.0   | 1.61    |
|             | Acute corner (B)                       | 22.4                     | 51.2  | 21.4  | 4.7   | 0.5   | 0.0   | 0.0   | 0.65    |
| <b>340K</b> | Face (A)                               | 40.4                     | 50.7  | 8.4   | 2.8   | 0.1   | 0.0   | 0.0   | 0.58    |
|             | Face (X)                               | 60.0                     | 35.3  | 4.7   | 0.1   | 0.0   | 0.0   | 0.0   | 0.27    |
|             | Face (B)                               | 44.5                     | 47.6  | 7.7   | 0.2   | 0.0   | 0.0   | 0.0   | 0.36    |
|             | Acute edge (A)                         | 34.2                     | 42.1  | 20.3  | 3.2   | 0.1   | 0.0   | 0.0   | 0.73    |
|             | Acute edge (X)                         | 24.3                     | 45.6  | 21.5  | 7.4   | 1.0   | 0.2   | 0.0   | 1.48    |
|             | Acute edge (B)                         | 46.4                     | 49.2  | 4.1   | 0.3   | 0.0   | 0.0   | 0.0   | 0.39    |
|             | Obtuse edge (A)                        | 30.8                     | 38.1  | 19.8  | 9.0   | 2.2   | 0.1   | 0.0   | 1.12    |
|             | Obtuse edge (X)                        | 31.5                     | 42.2  | 18.2  | 6.8   | 1.3   | 0.1   | 0.0   | 0.92    |
|             | Obtuse edge (B)                        | 35.8                     | 53.2  | 10.4  | 0.5   | 0.0   | 0.0   | 0.0   | 0.62    |
|             | Acute corner (A)                       | 21.2                     | 47.6  | 25.5  | 5.4   | 0.4   | 0.0   | 0.0   | 1.53    |
|             | Acute corner (X)                       | 16.2                     | 49.2  | 29.3  | 5.0   | 0.3   | 0.0   | 0.0   | 1.54    |
|             | Acute corner (B)                       | 25.4                     | 50.6  | 19.2  | 4.2   | 0.7   | 0.0   | 0.0   | 0.61    |
